# Supplementary material for: Effects of the 2013 Psychiatric Current Procedural Terminology Codes Revision on Psychotherapy in Psychiatric Billing
Source: Atypon-hosted journal article supplement (doi:10.1176/appi.ps.201700031), 2017-08-15
Supplement: appi.ps.201700031.ds001.pdf [file appi.ps.201700031.ds001.pdf]

## Effects of the 2013 Psychiatric Current Procedural Terminology Codes Revision on Psychotherapy in Psychiatric Billing

### APPENDICES

#### Appendix 1. Sample Characteristics by Visit

|                                                                   | Percent             |                      |                      |
|-------------------------------------------------------------------|---------------------|----------------------|----------------------|
|                                                                   | 2012<br>(n=778,445) | 2013<br>(n= 748,317) | 2014<br>(n= 754,760) |
| <b>Sex</b>                                                        |                     |                      |                      |
| Male                                                              | 42                  | 41                   | 42                   |
| Female                                                            | 58                  | 59                   | 58                   |
| <b>Age</b>                                                        |                     |                      |                      |
| 0-17                                                              | 18                  | 19                   | 18                   |
| 18-34                                                             | 28                  | 29                   | 29                   |
| 35-44                                                             | 18                  | 18                   | 18                   |
| 45-54                                                             | 20                  | 19                   | 19                   |
| 55-64                                                             | 16                  | 15                   | 16                   |
| <b>Region</b>                                                     |                     |                      |                      |
| North Central                                                     | 17                  | 18                   | 18                   |
| Northeast                                                         | 18                  | 17                   | 24                   |
| South                                                             | 47                  | 45                   | 39                   |
| West                                                              | 18                  | 20                   | 18                   |
| <b>Primary Diagnosis</b>                                          |                     |                      |                      |
| Adjustment disorders                                              | 5                   | 4                    | 4                    |
| Alcohol-related disorders                                         | 1                   | 1                    | 1                    |
| Anxiety disorders                                                 | 17                  | 17                   | 19                   |
| Attention-deficit, conduct, and disruptive behavior disorders     | 14                  | 14                   | 14                   |
| Disorders usually diagnosed in infancy, childhood, or adolescence | 1                   | 1                    | 1                    |
| Delirium, dementia, and amnesic and other cognitive disorders     | <1                  | <1                   | <1                   |
| Developmental disorders                                           | <1                  | <1                   | <1                   |
| Impulse control disorders, not elsewhere classified (NEC)         | <1                  | <1                   | <1                   |
| Mood disorders                                                    | 54                  | 53                   | 52                   |
| Other category                                                    | 4                   | 4                    | 3                    |
| Personality disorders                                             | <1                  | <1                   | <1                   |
| Schizophrenia and other psychotic disorders                       | 2                   | 2                    | 2                    |
| Substance-related disorders                                       | 2                   | 2                    | 2                    |

Note: values were rounded to whole digits

## Effects of the 2013 Psychiatric Current Procedural Terminology Codes Revision on Psychotherapy in Psychiatric Billing

### Appendix 2. Ten Most Frequent Current Procedure Terminology Codes Used for Psychiatrist Office

Visits, 2012 and 2013

| <b>Code</b> | <b>Name</b>                                                                                                                     | <b>Percent</b> | <b>Cumulative Percent</b> |
|-------------|---------------------------------------------------------------------------------------------------------------------------------|----------------|---------------------------|
| <b>2012</b> |                                                                                                                                 |                |                           |
| 90862       | Pharmacologic management, including prescriptions, use and review of medication with no more than minimal medical psychotherapy | 27             | 27                        |
| 90805       | Individual psychotherapy with E/M, 20-30 min                                                                                    | 20             | 47                        |
| 90807       | Individual psychotherapy with E/M, 45-50 min                                                                                    | 15             | 62                        |
| 90806       | Individual psychotherapy 45-50 min                                                                                              | 14             | 76                        |
| 90801       | Psychiatric diagnostic interview examination                                                                                    | 7              | 83                        |
| 99214       | Established Patient Office Visit                                                                                                | 2              | 85                        |
| 90847       | Family Psychotherapy                                                                                                            | 2              | 87                        |
| 90853       | Group Psychotherapy                                                                                                             | 1              | 88                        |
| 99213       | Established Patient Office Visit                                                                                                | 1              | 88                        |
| 80101       | Drug screen, qualitative; multiple drug classes other than chromatographic, each procedure                                      | 1              | 89                        |
| <b>2013</b> |                                                                                                                                 |                |                           |
| 99213       | Established Patient Office Visit (low to moderate severity)                                                                     | 26             | 26                        |
| 99214       | Established Patient Office Visit (moderate severity)                                                                            | 18             | 43                        |
| 90833       | Psychotherapy Add-On (16-37 min)                                                                                                | 12             | 55                        |
| 90834       | Psychotherapy 45 (38-52 min)                                                                                                    | 8              | 63                        |
| 90836       | Psychotherapy Add-On (38-52 min)                                                                                                | 7              | 71                        |
| 90837       | Psychotherapy 60 (53+ min)                                                                                                      | 4              | 75                        |
| 90792       | Psychiatric Diagnostic Evaluation with Medical Services                                                                         | 4              | 79                        |
| 99212       | Established Patient Office Visit (low severity)                                                                                 | 4              | 82                        |
| 99215       | Established Patient Office Visit (high severity)                                                                                | 2              | 85                        |
| 90791       | Psychiatric diagnostic evaluation                                                                                               | 1              | 86                        |

## Effects of the 2013 Psychiatric Current Procedural Terminology Codes Revision on Psychotherapy in Psychiatric Billing

Appendix 3. Changes in the probability a visit to a psychiatrist included psychotherapy), 2012–2014

| Predictor                                                         | Percentage Point Change | Standard Error | P-Value |
|-------------------------------------------------------------------|-------------------------|----------------|---------|
| <b>Primary Predictor</b>                                          |                         |                |         |
| <b>Year (Base: 2012)</b>                                          |                         |                |         |
| Year 2013                                                         | -9.82                   | 0.17           | <0.001  |
| Year 2014                                                         | -9.39                   | 0.18           | <0.001  |
| <b>Control Variables</b>                                          |                         |                |         |
| <b>Sex (reference: Male)</b>                                      |                         |                |         |
| Female                                                            | 0.05                    | 0.13           | 0.704   |
| <b>Age (reference: 18 -34 )</b>                                   |                         |                |         |
| Age <=17 Years                                                    | 0.87                    | 0.18           | <0.001  |
| Age 35 to 44                                                      | 1.77                    | 0.18           | <0.001  |
| Age 45 to 54                                                      | 1.58                    | 0.18           | <0.001  |
| Age 55 to 64                                                      | 2.97                    | 0.21           | <0.001  |
| <b>Diagnosis (Reference: Mood Disorders)</b>                      |                         |                |         |
| Adjustment disorders                                              | 12.14                   | 0.27           | <0.001  |
| Anxiety disorders                                                 | 2.27                    | 0.14           | <0.001  |
| Attention-deficit, conduct, and disruptive behavior disorders     | -2.03                   | 0.16           | <0.001  |
| Delirium, dementia, and amnesic and other cognitive disorders     | -9.3                    | 1.17           | <0.001  |
| Developmental disorders                                           | -20.67                  | 1.45           | <0.001  |
| Disorders usually diagnosed in infancy, childhood, or adolescence | -0.05                   | 0.46           | 0.905   |
| Impulse control disorders, NEC                                    | -3.45                   | 0.81           | <0.001  |
| Personality disorders                                             | 3.26                    | 0.83           | <0.001  |
| Schizophrenia and other psychotic disorders                       | -5.34                   | 0.35           | <0.001  |
| Alcohol-related disorders                                         | -3.22                   | 0.51           | <0.001  |
| Substance-related disorders                                       | -4.84                   | 0.35           | <0.001  |
| Other diagnoses                                                   | -22.03                  | 0.27           | <0.001  |
| <b>Region (reference: South)</b>                                  |                         |                |         |
| Northeast                                                         | 7.93                    | 0.3            | <0.001  |
| Northcentral                                                      | 1.79                    | 0.22           | <0.001  |
| West                                                              | 15.98                   | 0.26           | <0.001  |
| <b>Annual Visits by Psychiatrist (reference: &lt;50)</b>          |                         |                |         |
| 50 to 100                                                         | -2.11                   | 0.2            | <0.001  |
| 101 to 200                                                        | -3.1                    | 0.19           | <0.001  |
| 201 to 500                                                        | -6                      | 0.18           | <0.001  |
| 501 to 1000                                                       | -8.75                   | 0.21           | <0.001  |
| 1001 to 2000                                                      | -13.44                  | 0.29           | <0.001  |
| >2000                                                             | -4.4                    | 0.37           | <0.001  |

Notes: Results based on a multivariable linear probability model with insurance plan fixed effects. The model R-Square was 0.7556. The model MSE was 0.5419, F Value = 5.87, P-value < 0.0001.
